# Supplementary material for: Direct-Ink-Write Printing and Electrospinning of Cellulose Derivatives for Conductive Composite Materials
Source: MDPI journal article supplement (doi:10.3390/ma15082840), 2022-04-13
Supplement: s1 [file s1]

## Supporting Information

### **Direct-Ink-Write Printing and Electrospinning of Cellulose Derivatives for Conductive Composite Materials**

Runfeng Shi<sup>1,†</sup>, Jiankang Zhang<sup>1,†</sup>, Jinheng Yang<sup>1</sup>, Yanglei Xu<sup>1</sup>, Cuihuan Li<sup>1</sup>, Sheng Chen<sup>1,\*</sup>, Feng Xu<sup>2,\*</sup>

<sup>1</sup> Beijing Key Laboratory of Lignocellulosic Chemistry, Beijing Forestry University, Beijing 100083, China; 1196181303@qq.com (R.S.); jiankang\_zhang@bjfu.edu.cn (J.Z.); bjfuyjh@163.com (J.Y.); xuyanglei@bjfu.edu.cn (Y.X.); cuihuanli@bjfu.edu.cn (C.L.)

<sup>2</sup> State Key Laboratory of Biobased Material and Green Papermaking, Qilu University of Technology, Shandong Academy of Sciences, Jinan 250353, China

\* Correspondence: shengchen@bjfu.edu.cn (S.C.); xfx315@bjfu.edu.cn (F.X.)

† These authors contributed equally to this work.

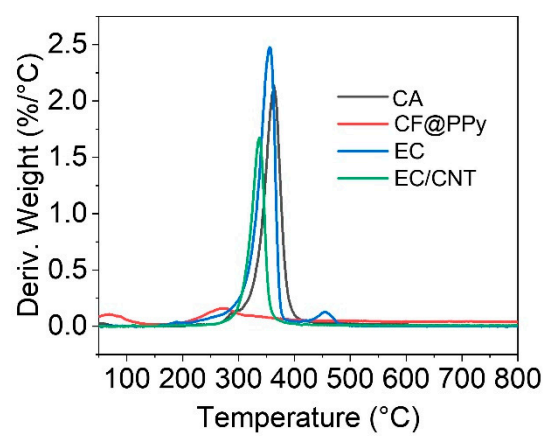

**Figure S1.** DTG curves of CA, CF@PPy, EC, and EC/CNT.

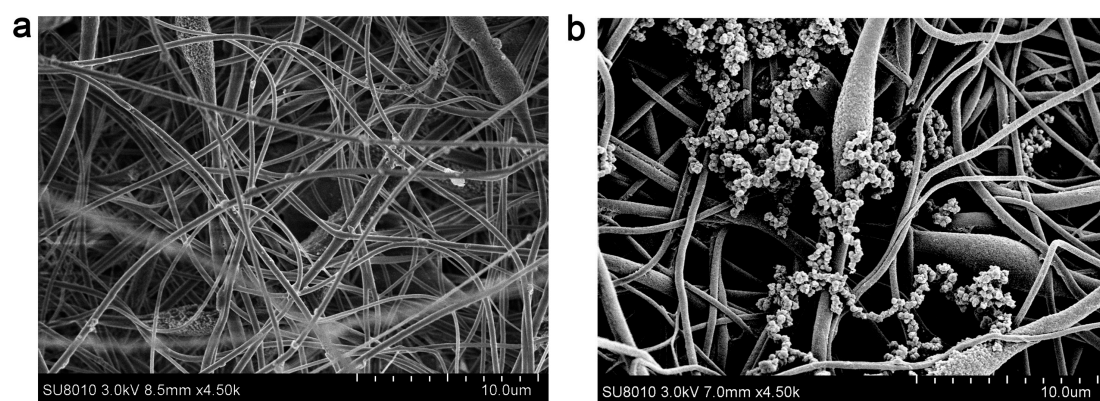

**Figure S2.** SEM images of the (a) deacetylated CA film and (b) reformed CF@PPy film after filtration.

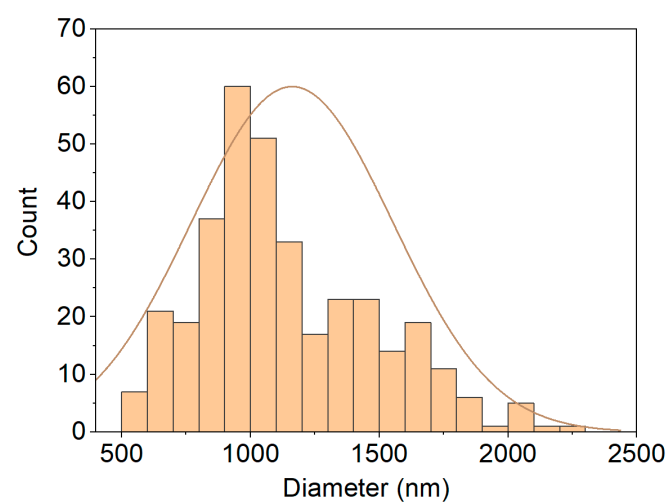

**Figure S3.** Diameter distribution of CF@PPy.

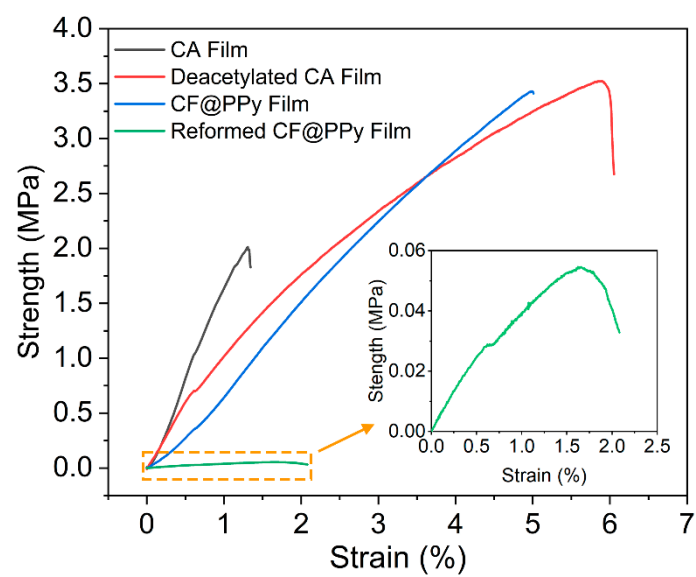

**Figure S4.** Mechanical property of the CA film, deacetylated CA film, CF@PPy film, and reformed CF@PPy film after filtration.

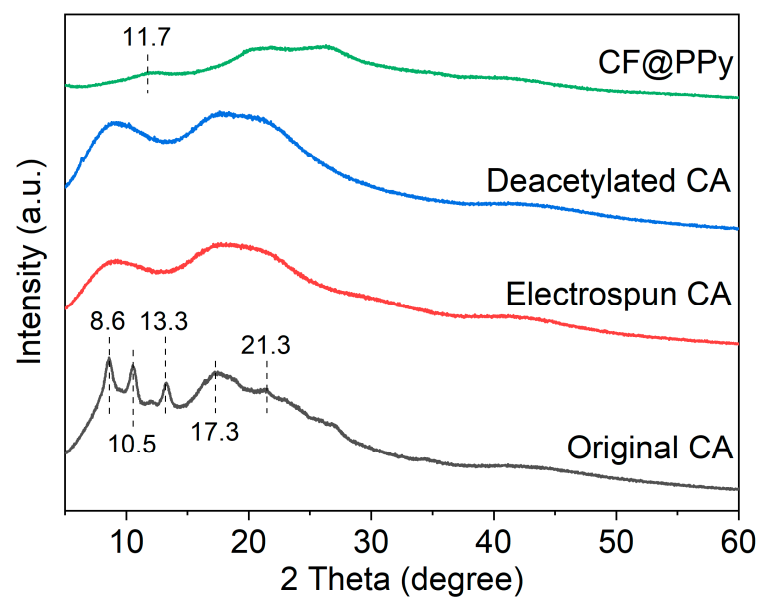

**Figure S5.** XRD patterns of the original CA powder, electrospun CA, deacetylated CA, and CF@PPy.

Table S1. Comparison of the pressure sensor in our work with others in literature.

| References | Materials                                      | Sensitivity<br>(KPa <sup>-1</sup> ) | Pressure range<br>(KPa) |
|------------|------------------------------------------------|-------------------------------------|-------------------------|
| Our work   | Ethyl cellulose and polypyrrole                | 0.0584                              | 2-8                     |
| [60]       | Polyurethane sponge and reduced graphene oxide | 0.03                                | 2-10                    |
| [61]       | Polyaniline sponge, reduced graphene oxide     | 0.042-0.152                         | 0-27                    |
| [62]       | Graphene/polyimide foam                        | 0.023                               | 3.5-6.5                 |
| [63]       | Graphene/carbon nanotube foam                  | 0.02                                | 2.5-13                  |
| [64]       | Polyvinyl alcohol and polyacrylamide           | 0.02                                | 3.27-6.83               |
| [65]       | Polyacrylamide and polyaniline                 | 0.05                                | 1-10                    |
| [66]       | SiO <sub>2</sub> nanofibers and alginate       | 0.24                                | 2.5-6                   |
| [67]       | Graphene sheet and Cu/Au electrodes            | 0.0045                              | 0-50                    |
| [68]       | Graphene foam                                  | 0.027                               | 0-50                    |
| [69]       | CNT/graphene                                   | 0.27                                | 0.3-6                   |

## References

1. Yao, H.B.; Ge, J.; Wang, C.F.; Wang, X.; Hu, W.; Zheng, Z.J.; Ni, Y.; Yu, S.H. A Flexible and Highly Pressure-Sensitive Graphene-Polyurethane Sponge Based on Fractured Microstructure Design. *Adv. Mater.* **2013**, *25*, 6692–6698.
2. Ge, G.; Cai, Y.; Dong, Q.; Zhang, Y.; Shao, J.; Huang, W.; Dong, X. A Flexible Pressure Sensor Based on RGO/Polyaniline Wrapped Sponge with Tunable Sensitivity for Human Motion Detection. *Nanoscale* **2018**, *10*, 10033–10040.
3. Qin, Y.; Peng, Q.; Ding, Y.; Lin, Z.; Wang, C.; Li, Y.; Xu, F.; Li, J.; Yuan, Y.; He, X.; Li, Y. Lightweight, Superelastic, and Mechanically Flexible Graphene/Polyimide Nanocomposite Foam for Strain Sensor Application. *ACS Nano* **2015**, *9*, 8933–8941.
4. Kuang, J.; Dai, Z.; Liu, L.; Yang, Z.; Jin, M.; Zhang, Z. Synergistic Effects from Graphene and Carbon Nanotubes Endow Ordered Hierarchical Structure Foams with a Combination of Compressibility, Super-Elasticity and Stability and Potential Application as Pressure Sensors. *Nanoscale* **2015**, *7*, 9252–9260.
5. Ge, G.; Zhang, Y.; Shao, J.; Wang, W.; Si, W.; Huang, W.; Dong, X. Stretchable, Transparent, and Self-Patterned Hydrogel-Based Pressure Sensor for Human Motions Detection. *Adv. Funct. Mater.* **2018**, *28*, 1802576.
6. Duan, J.; Liang, X.; Guo, J.; Zhu, K.; Zhang, L. Ultra-Stretchable and Force-Sensitive Hydrogels Reinforced with Chitosan Microspheres Embedded in Polymer Networks. *Adv. Mater.* **2016**, *28*, 8037–8044.
7. Si, Y.; Wang, L.; Wang, X.; Tang, N.; Yu, J.; Ding, B. Ultrahigh-Water-Content, Superelastic, and Shape-Memory Nanofiber-Assembled Hydrogels Exhibiting Pressure Responsive Conductivity. *Adv. Mater.* **2017**, *29*, 1–7.
8. Mohammad Haniff, M.A.S.; Muhammad Hafiz, S.; Wahid, K.A.A.; Endut, Z.; Wah Lee, H.; Bien, D.C.S.; Abdul Azid, I.; Abdullah, M.Z.; Ming Huang, N.; Abdul Rahman, S. Piezoresistive Effects in Controllable Defective HFTCVD Graphene-Based Flexible Pressure Sensor. *Sci. Rep.* **2015**, *5*, 1–10.
9. Yang, J.; Li, X.; Lu, X.; Bao, W.; Chen, R. Three-Dimensional Interfacial Stress Sensor Based on Graphene Foam. *IEEE Sens. J.* **2018**, *8*, 1.
10. Jian, M.; Xia, K.; Wang, Q.; Yin, Z.; Wang, H.; Wang, C.; Xie, H.; Zhang, M.; Zhang, Y. Flexible and highly sensitive pressure sensors based on bionic hierarchical structures. *Adv. Funct. Mater.* **2017**, *27*, 1606066.
